# Supplementary material for: Synthetic, spectral and structural studies of a Schiff base and its anticorrosive activity on mild steel in H2SO4
Source: Royal Society of Chemistry journal article supplement (doi:10.1039/c7nj00896a), 2017-01-01
Supplement: c7nj00896a1.pdf [file c7nj00896a1.pdf]

## **Electronic Supplementary Information**

### **Synthetic, Spectral and Structural Studies of a Schiff Base and its Anticorrosive Activity on Mild Steel in H<sub>2</sub>SO<sub>4</sub>**

Akshay Kumar, Manoj Trivedi, Bhaskaran, Raj Kishore Sharma and Gurmeet Singh\*

<sup>a\*</sup>Department of Chemistry, University of Delhi, Delhi-110007, India

E-mail address: gurmeet123@yahoo.com.

Corresponding author. Tel.: + 91 9810390640 (GS).

**Table S1.** Selected bond lengths (Å), and bond angles (°) for **L**.

| Bond length (Å) |          | Bond Angle (°)    |          |
|-----------------|----------|-------------------|----------|
| O(1)- C(3)      | 1.235(3) | C(7)-C(8)-C(9)    | 120.5(3) |
| N(1)- C(1)      | 1.356(3) | C(6)-C(7)-C(8)    | 120.3(3) |
| N(1)- N(2)      | 1.409(3) | C(18)-C(17)-C(16) | 121.9(3) |
| N(1) C(10)      | 1.463(3) | C(1)-N(1)-N(2)    | 106.9(2) |
| N(3)- C(12)     | 1.277(3) | C(1)-N(1)-C(10)   | 123.9(2) |
| N(3)- C(2)      | 1.396(3) | N(2)-N(1)-C(10)   | 117.4(2) |
| N(2)- C(3)      | 1.405(3) | C(12)-N(3)-C(2)   | 121.0(2) |
| N(2)- C(4)      | 1.423(3) | C(3)-N(2)-N(1)    | 108.8(2) |
|                 |          | C(3)-N(2)-C(4)    | 122.0(2) |
|                 |          | N(1)-N(2)-C(4)    | 119.3(2) |
|                 |          | N(1)-C(1)-C(2)    | 110.5(2) |
|                 |          | N(1)-C(1)-C(11)   | 121.7(2) |
|                 |          | C(2)-C(1)-C(11)   | 127.8(3) |
|                 |          | C(1)-C(2)-N(3)    | 122.2(2) |
|                 |          | C(1)-C(2)-C(3)    | 108.0(2) |
|                 |          | N(3)-C(2)-C(3)    | 129.5(2) |
|                 |          | O(1)-C(3)-N(2)    | 122.9(2) |
|                 |          | O(1)-C(3)-C(2)    | 132.0(3) |
|                 |          | N(2)-C(3)-C(2)    | 105.0(2) |
|                 |          | C(9)-C(4)-C(5)    | 120.1(3) |
|                 |          | C(9)-C(4)-N(2)    | 121.5(2) |
|                 |          | C(5)-C(4)-N(2)    | 118.3(3) |
|                 |          | N(3)-C(12)-C(13)  | 121.5(3) |
|                 |          | C(6)-C(5)-C(4)    | 119.4(3) |
|                 |          | C(18)-C(13)-C(14) | 117.6(3) |
|                 |          | C(18)-C(13)-C(12) | 122.1(3) |
|                 |          | C(14)-C(13)-C(12) | 120.3(3) |
|                 |          | C(15)-C(14)-C(13) | 121.7(3) |
|                 |          | C(4)-C(9)-C(8)    | 119.4(3) |
|                 |          | C(16)-C(15)-C(14) | 120.4(3) |
|                 |          | C(15)-C(16)-C(17) | 118.0(3) |
|                 |          | C(15)-C(16)-C(19) | 121.1(3) |
|                 |          | C(17)-C(16)-C(19) | 120.9(3) |
|                 |          | C(7)-C(6)-C(5)    | 120.3(3) |
|                 |          | C(17)-C(18)-C(13) | 120.5(3) |

**Table S2.** Hydrogen bond parameters for **L**.

| D-H···A-X                           | <i>d</i> H···A Å | <i>D</i> D···A Å | $\theta$ D-H···A° |
|-------------------------------------|------------------|------------------|-------------------|
| <b>1</b>                            |                  |                  |                   |
| C(12)-H(12)··· O(1)                 | 2.37(3)          | 3.047(4)         | 125(2)            |
| C(15)-H(15)··· O(1) <sup>a</sup>    | 2.48             | 3.313(4)         | 149               |
| symmetry equivalents: (a)2-X,-Y,-Z. |                  |                  |                   |

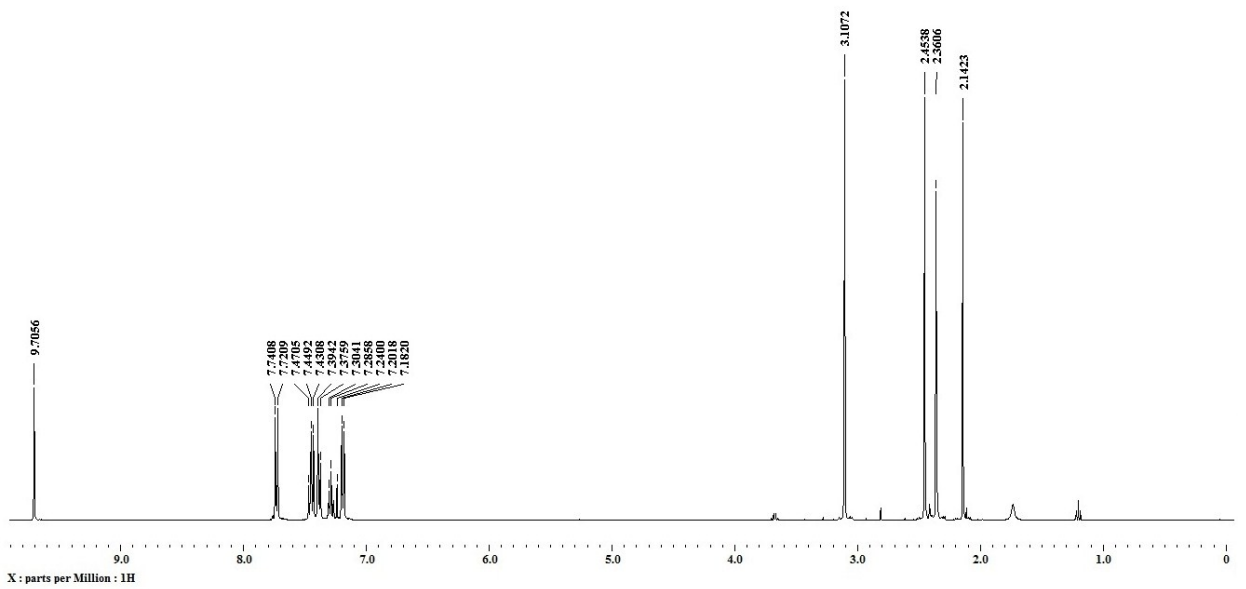

Figure F1.  $^1\text{H}$  NMR spectrum of L.

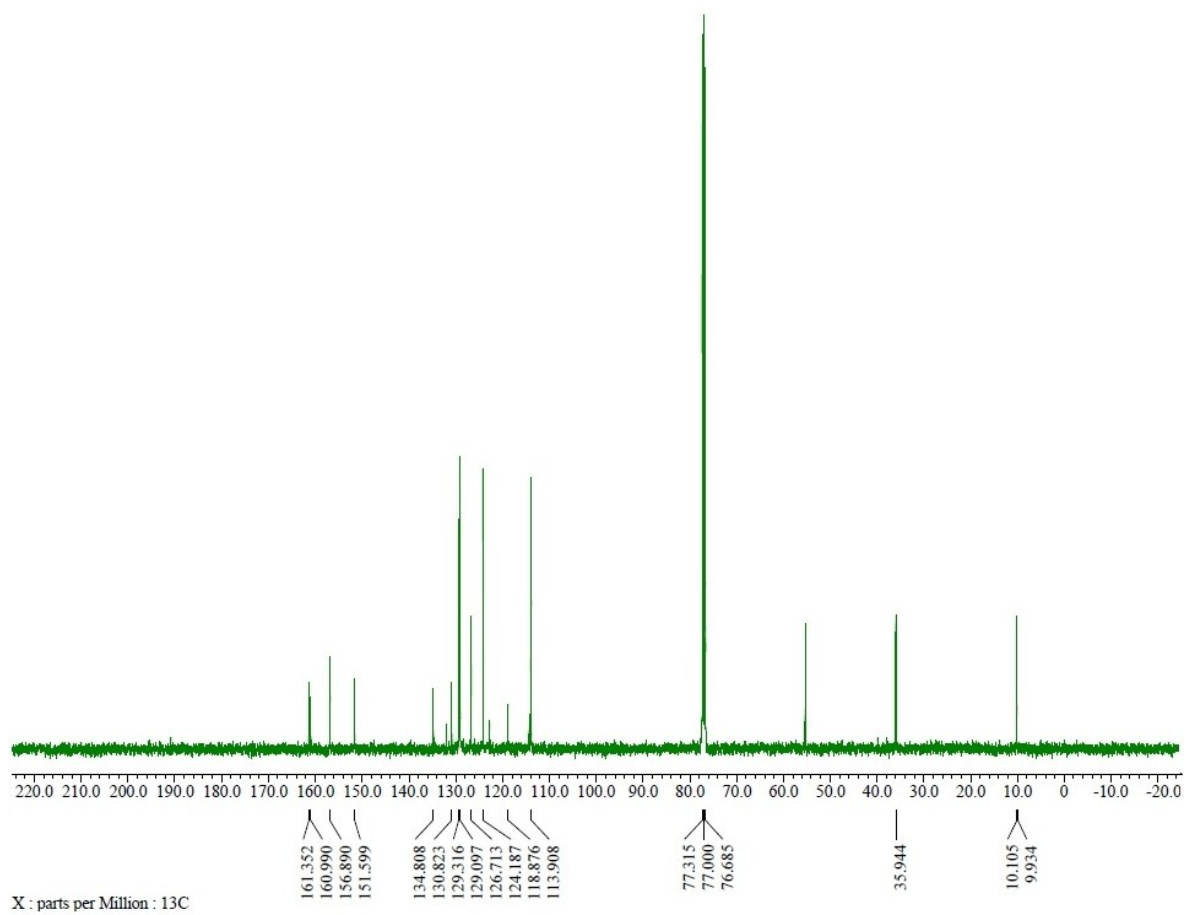

Figure F2.  $^{13}\text{C}$  NMR spectrum of L.

## Qualitative Compound Report

|                        |              |               |                     |
|------------------------|--------------|---------------|---------------------|
| Data File              | AK-schiff.d  | Sample Name   | AK-schiff           |
| Sample Type            | Sample       | Position      | P1-B4               |
| Instrument Name        | Instrument 1 | User Name     |                     |
| Acq Method             | 29.10.2014.m | Acquired Time | 11-05-2017 13:25:16 |
| IRM Calibration Status | Success      | DA Method     | Default.m           |
| Comment                |              |               |                     |

|                |                             |
|----------------|-----------------------------|
| Sample Group   | Info.                       |
| Acquisition SW | 6200 series TOF/6500 series |
| Version        | Q-TOF B.05.01 (B5125)       |

### Compound Table

| Compound Label      | RT | Mass     | Formula      | MFG Formula  | MFG Diff (ppm) | DB Formula   |
|---------------------|----|----------|--------------|--------------|----------------|--------------|
| Cpd 4: C19 H19 N3 O | 11 | 305.1534 | C19 H19 N3 O | C19 H19 N3 O | -2.09          | C19 H19 N3 O |

| Compound Label      | m/z      | RT | Algorithm                 | Mass     |
|---------------------|----------|----|---------------------------|----------|
| Cpd 4: C19 H19 N3 O | 306.1607 | 11 | Find by Molecular Feature | 305.1534 |

### MFE MS Spectrum

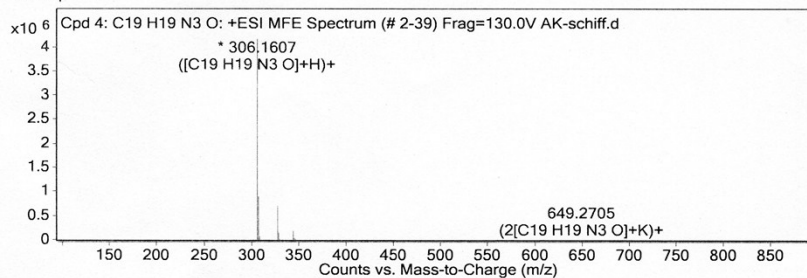

### MFE MS Zoomed Spectrum

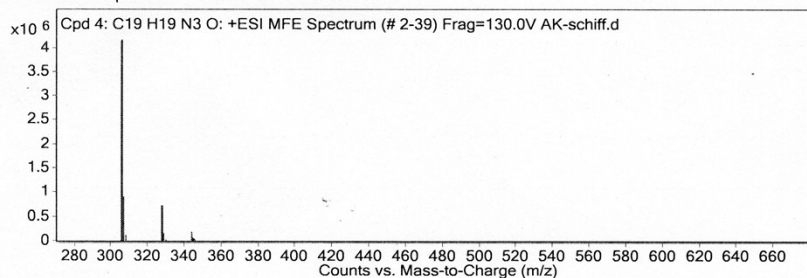

### MS Spectrum Peak List

| m/z      | z | Abund     | Formula      | Ion     |
|----------|---|-----------|--------------|---------|
| 306.1607 | 1 | 4162072   | C19 H19 N3 O | (M+H)+  |
| 307.1642 | 1 | 900961.33 | C19 H19 N3 O | (M+H)+  |
| 308.1668 | 1 | 96179.13  | C19 H19 N3 O | (M+H)+  |
| 309.1688 | 1 | 7836.04   | C19 H19 N3 O | (M+H)+  |
| 328.1429 | 1 | 718592.69 | C19 H19 N3 O | (M+Na)+ |
| 329.1457 | 1 | 145851.92 | C19 H19 N3 O | (M+Na)+ |
| 330.1487 | 1 | 16339.05  | C19 H19 N3 O | (M+Na)+ |
| 344.1166 | 1 | 185627.09 | C19 H19 N3 O | (M+K)+  |
| 345.1195 | 1 | 40311.35  | C19 H19 N3 O | (M+K)+  |
| 346.1169 | 1 | 16867.37  | C19 H19 N3 O | (M+K)+  |

--- End Of Report ---
